# Supplementary material
Source: PubMed Central journal article supplement (PMC4352670)
Supplement: JB.02508-14_zjb999093541so1.pdf [file JB.02508-14_zjb999093541so1.pdf]

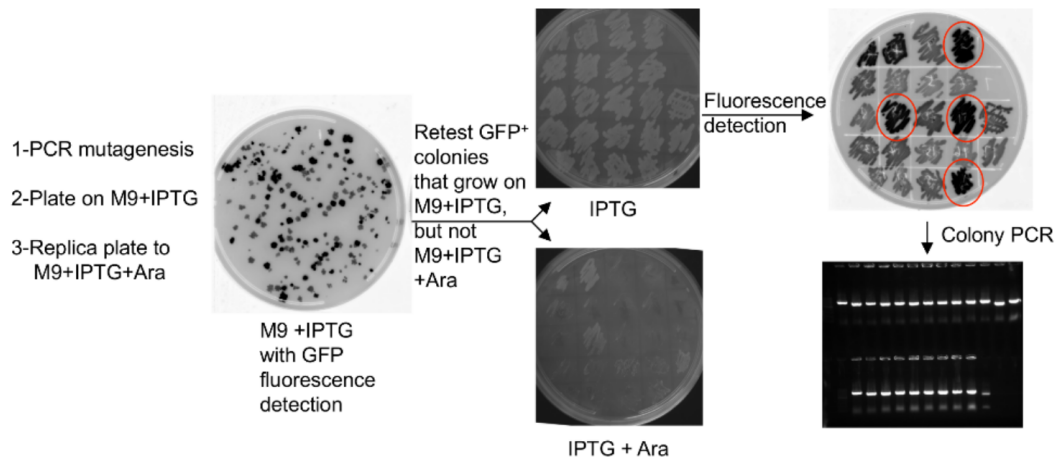

**Supplementary Figure 1. Workflow for isolation of loss of function mutations in VapB4  $\Delta$ 54.** Details are as described in Materials and Methods.
