# Supplementary material
Source: PubMed Central journal article supplement (PMC4352670)
Supplement: JB.02508-14_zjb999093541so2.pdf [file JB.02508-14_zjb999093541so2.pdf]

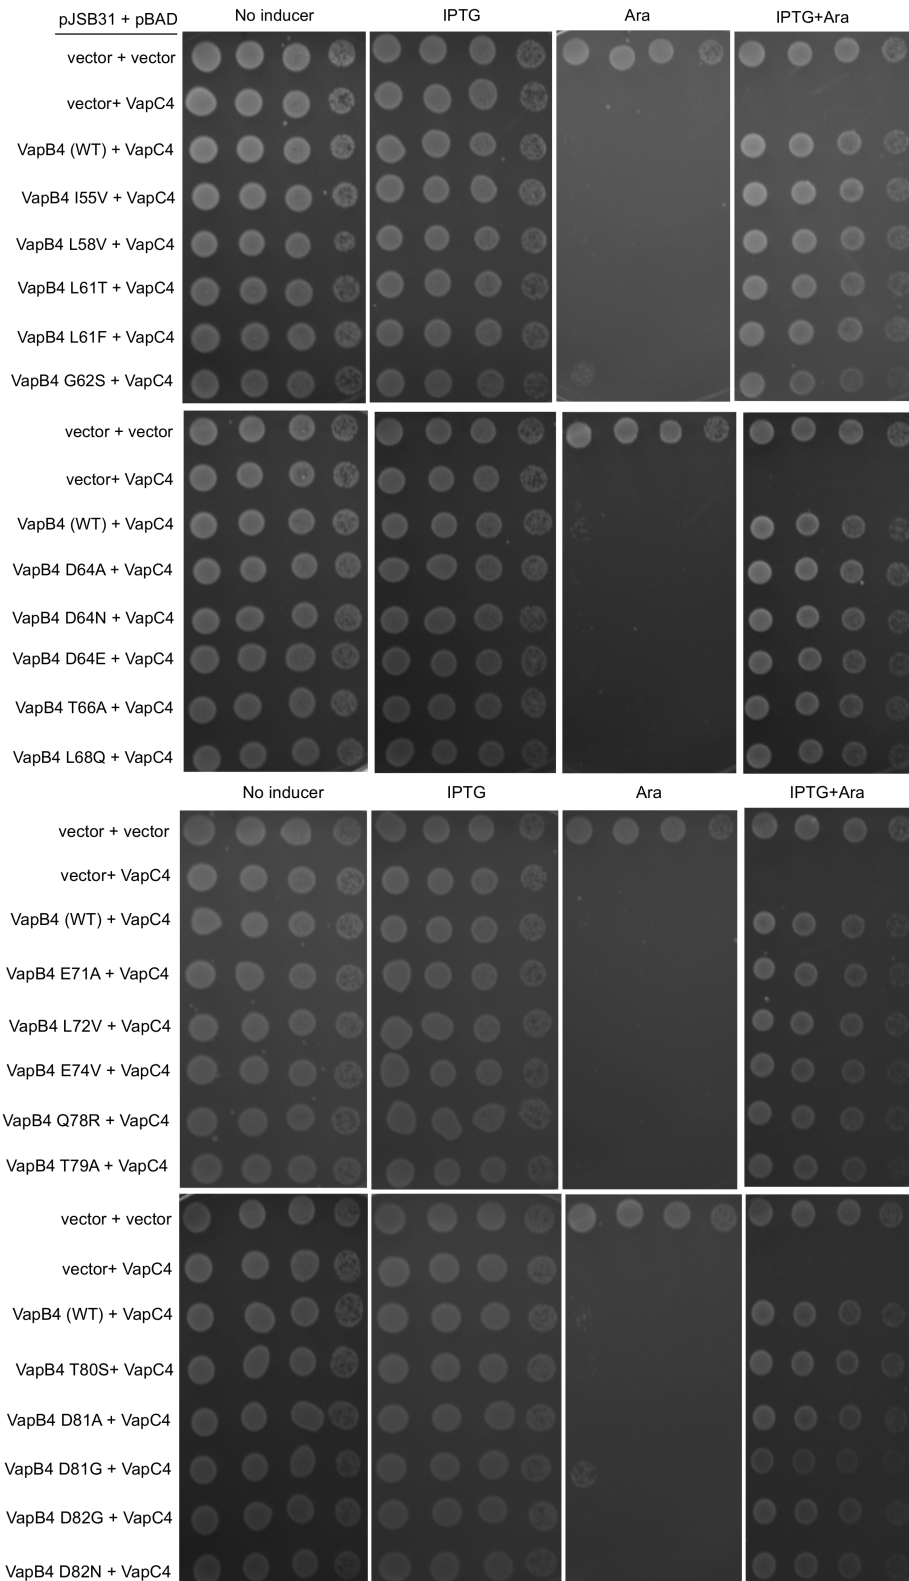

**Supplementary Figure 2. Single mutations do not affect antitoxin activity in the context of full length VapB4.** Spotting assay for *E. coli* strain LMG194 carrying the indicated plasmids was performed as described in Figure 1B.
